# Supplementary material
Source: PubMed Central journal article supplement (PMC7368995)
Supplement: NIHMS1048264-supplement-Appendix_4.pdf [file NIHMS1048264-supplement-Appendix_4.pdf]

Appendix 4. Catheterized and Total Patient Urine Culture Orders and Rates in Non-Pilot Units

|                           | Pre-<br>Intervention | Post-<br>Intervention 1 | Post-<br>Intervention 2 | P value<br>(pre-post1) | P value<br>(pre-post2) |
|---------------------------|----------------------|-------------------------|-------------------------|------------------------|------------------------|
| <b>Catheter Days</b>      | 3360                 | 3369                    | 3248                    |                        |                        |
| <b>Catheter UAs, n</b>    | 130                  | 132                     | 124                     | 0.97                   | 0.48                   |
| <b>Rate</b>               | 39                   | 39                      | 38                      |                        |                        |
| <b>Catheter UCs, n</b>    | 116                  | 106                     | 87                      | 0.50                   | 0.09                   |
| <b>Rate</b>               | 35                   | 32                      | 27                      |                        |                        |
| <b>Total Patient Days</b> | 24144                | 24155                   | 24272                   |                        |                        |
| <b>Total UAs</b>          | 3841                 | 3849                    | 4296                    | 0.96                   | <0.001                 |
| <b>Rate</b>               | 159                  | 159                     | 177                     |                        |                        |
| <b>Total UCs</b>          | 1620                 | 1547                    | 1454                    | 0.21                   | 0.002                  |
| <b>Rate</b>               | 67                   | 64                      | 60                      |                        |                        |

Rate is orders/1000 patient days; UA=urinalysis, UC=urine culture
